# Supplementary material
Source: PubMed Central journal article supplement (PMC8090891)
Supplement: AEM.02539-20-s0001.pdf [file AEM.02539-20-s0001.pdf]

**Supplementary Table 1.** MIC ranges to amphotericin B, anidulafungin and caspofungin. *A. fumigatus* isolates are grouped based on their azole susceptibility profile and their Cyp51A modifications.

| Cyp51A modifications<br>(# isolates)           | WGS<br>Cluster | MIC/MEC ranges to other classes of clinical<br>antifungal drugs (mg/L) |            |           |
|------------------------------------------------|----------------|------------------------------------------------------------------------|------------|-----------|
|                                                |                | AmB                                                                    | ANF        | CSF       |
| <b>AZL-S</b>                                   |                |                                                                        |            |           |
| WT (20)                                        | I-II           | 0.25-1                                                                 | 0.007-0.06 | 0.125-0.5 |
| 5SNPs* (6)                                     | III            | 0.125-1                                                                | 0.015-0.06 | 0.25-0.5  |
| 3SNPs** (11)                                   | IV             | 0.125-0.5                                                              | 0.03-0.06  | 0.25-0.5  |
| <b>AZL-R - point mutations</b>                 |                |                                                                        |            |           |
| G54 (12)                                       | I-II           | 0.25-0.5                                                               | 0.015-0.06 | 0.25-0.5  |
| M220 (7)                                       | I-II           | 0.25-0.5                                                               | 0.015-0.06 | 0.25-0.5  |
| G448S (5)                                      | I-II           | 0.25-0.5                                                               | 0.015-0.06 | 0.25-0.5  |
| <b>AZL-R - TR integrations<sup>&amp;</sup></b> |                |                                                                        |            |           |
| TR <sub>34</sub> /L98H (12)                    | II             | 0.25-0.5                                                               | 0.007-0.06 | 0.25-0.5  |
| TR <sub>34</sub> /L98H/ S297T/F495I (3)        | II             | 0.25-0.5                                                               | 0.015-0.06 | 0.25-0.5  |
| TR <sub>46</sub> /Y121F/T289A (4)              | II             | 0.25-0.5                                                               | 0.015-0.06 | 0.25-0.5  |
| TR <sub>53</sub> (3)                           | II             | 0.25-0.5                                                               | 0.03-0.06  | 0.25-0.5  |

AmB (amphotericin B), ANF (anidulafungin) and CSF (caspofungin)  
MIC (minimal inhibitory concentration) for AmB and MEC (minimal effective concentration) for echinocandins

AZL-S (azole susceptible), AZL-R (azole resistant)

\*5SNPs: F46Y/M172V/N248T/D255E/E427K

\*\*3SNPs: F46Y/M172V/E427K

<sup>&</sup>Tandem repeat (TR) integration in the *cyp51A* promoter in combination, or not, with point mutations.

**Table S2.** MIC ranges to four new triazole DMIs. *A. fumigatus* isolates are grouped based on their azole susceptibility profile and their Cyp51A modifications.

| Cyp51A<br>modifications (# isolates)           | WGS<br>Cluster | MIC ranges to triazole DMIs (mg/L) |         |        |         |
|------------------------------------------------|----------------|------------------------------------|---------|--------|---------|
|                                                |                | BTN                                | MCB     | TDM    | PCZ     |
| <b>AZL-S</b>                                   |                |                                    |         |        |         |
| WT (20)                                        | I-II           | 4-8                                | 8-16    | >32    | 8-16    |
| 5SNPs* (6)                                     | III            | 4- >32                             | 16- >32 | >32    | 16      |
| 3SNPs** (11)                                   | IV             | 2-8                                | 8-16    | >32    | 8-16    |
| <b>AZL-R - point mutations</b>                 |                |                                    |         |        |         |
| G54 (12)                                       | I-II           | 1-2                                | 1-8     | 16->32 | 4-8     |
| M220 (7)                                       | I-II           | 2- >32                             | 16- >32 | >32    | 8- >32  |
| G448S (5)                                      | I-II           | >32                                | >32     | >32    | 16- >32 |
| <b>AZL-R - TR integrations<sup>&amp;</sup></b> |                |                                    |         |        |         |
| TR <sub>34</sub> /L98H (12)                    | II             | >32                                | >32     | >32    | 32- >32 |
| TR <sub>34</sub> /L98H/ S297T/F495I (3)        | II             | >32                                | >32     | >32    | >32     |
| TR <sub>46</sub> /Y121F/T289A (4)              | II             | >32                                | >32     | >32    | >32     |
| TR <sub>53</sub> (3)                           | II             | >32                                | >32     | >32    | >32     |

BTN (bitertanol), MCB (myclobutanil), TDM (triadimenol), PCZ (paclobutazol)

<sup>&</sup>Tandem repeat (TR) integration in the *cyp51A* promoter in combination, or not, with single point mutations.
